# Supplementary material for: Toxicity and Biotransformation of Carbon-Based Nanomaterials in Marine Microalgae Heterosigma akashiwo
Source: MDPI journal article supplement (doi:10.3390/ijms241210020), 2023-06-12
Supplement: s1 [file s1]

# Toxicity and Biotransformation of Carbon-Based Nanomaterials in Marine Microalgae *Heterosigma akashiwo*

Konstantin Pikula <sup>1</sup>, Seyed Ali Johari <sup>2</sup>, Ralph Santos-Oliveira <sup>3,4</sup> and Kirill Golokhvast <sup>1,5,\*</sup>

<sup>1</sup> Polytechnical Institute, Far Eastern Federal University, 10 Ajax Bay, Russky Island, 690922 Vladivostok, Russia

<sup>2</sup> Department of Fisheries, Faculty of Natural Resources, University of Kurdistan, Pasdaran St, Sanandaj 66177-15175, Iran

<sup>3</sup> Laboratory of Nanoradiopharmaceuticals and Synthesis of Novel Radiopharmaceuticals, Nuclear Engineering Institute, Brazilian Nuclear Energy Commission, Rua Hélio de Almeida 75, Rio de Janeiro 21941906, Brazil

<sup>4</sup> Laboratory of Nanoradiopharmaceuticals and Radiopharmacy, Rio de Janeiro State University, R. São Francisco Xavier, 524, Rio de Janeiro 23070200, Brazil

<sup>5</sup> Siberian Federal Scientific Center of Agrobiotechnology RAS, Centralnaya Str., Presidium, 633501 Krasnoobsk, Russia

\* Correspondence: golokhvast@sfsca.ru

**Table S1.** The statistical significance calculation of growth rate inhibition, cell size change, esterase activity, membrane potential, and ROS generation in *H. akashiwo* cells.

| Concentration, mg/L                   | CNTs           | C60            | Gr             | GrO            |
|---------------------------------------|----------------|----------------|----------------|----------------|
| <b>Growth rate inhibition, 96 h</b>   |                |                |                |                |
| 1                                     | 0.8565 (ns)    | 0.9994 (ns)    | 0.9465 (ns)    | 0.0822 (ns)    |
| 5                                     | <0.0001 (****) | 0.1846 (ns)    | 0.9968 (ns)    | 0.4746 (ns)    |
| 10                                    | <0.0001 (****) | 0.0640 (ns)    | 0.0170 (*)     | <0.0001 (****) |
| 25                                    | <0.0001 (****) | 0.0936 (ns)    | <0.0001 (****) | <0.0001 (****) |
| 50                                    | <0.0001 (****) | 0.0345 (*)     | <0.0001 (****) | <0.0001 (****) |
| 75                                    | <0.0001 (****) | <0.0001 (****) | <0.0001 (****) | <0.0001 (****) |
| 100                                   | <0.0001 (****) | <0.0001 (****) | <0.0001 (****) | <0.0001 (****) |
| 125                                   | <0.0001 (****) | <0.0001 (****) | <0.0001 (****) | <0.0001 (****) |
| <b>Growth rate inhibition, 7 days</b> |                |                |                |                |
| 1                                     | 0.0813 (ns)    | 0.9995 (ns)    | 0.1519 (ns)    | 0.0852 (ns)    |
| 5                                     | <0.0001 (****) | 0.0264 (*)     | 0.0235 (*)     | 0.0212 (*)     |
| 10                                    | <0.0001 (****) | 0.0148 (*)     | 0.0002 (**)    | 0.0003 (**)    |
| 25                                    | <0.0001 (****) | 0.0088 (**)    | <0.0001 (****) | <0.0001 (****) |
| 50                                    | <0.0001 (****) | 0.0647 (ns)    | <0.0001 (****) | <0.0001 (****) |
| 75                                    | <0.0001 (****) | 0.0578 (ns)    | 0.9184 (ns)    | <0.0001 (****) |
| 100                                   | <0.0001 (****) | 0.9067 (ns)    | 0.0009 (**)    | <0.0001 (****) |
| 125                                   | <0.0001 (****) | 0.7878 (ns)    | <0.0001 (****) | <0.0001 (****) |
| <b>Cell size change, 96 h</b>         |                |                |                |                |
| 10                                    | 0.0628 (ns)    | 0.2806 (ns)    | 0.6840 (ns)    | 0.2813 (ns)    |
| 25                                    | <0.0001 (****) | 0.0018 (**)    | 0.2774 (ns)    | 0.1005 (ns)    |
| 50                                    | <0.0001 (****) | <0.0001 (****) | 0.0435 (*)     | 0.0003 (**)    |
| 75                                    | <0.0001 (****) | <0.0001 (****) | 0.0016 (**)    | 0.9837 (ns)    |
| 100                                   | <0.0001 (****) | <0.0001 (****) | <0.0001 (****) | 0.0012 (**)    |
| 125                                   | <0.0001 (****) | <0.0001 (****) | <0.0001 (****) | <0.0001 (****) |
| <b>Cell size change, 7 days</b>       |                |                |                |                |

| Concentration, mg/L                    | CNTs           | C60          | Gr             | GrO            |
|----------------------------------------|----------------|--------------|----------------|----------------|
| 10                                     | 0.8743 (ns)    | 0.7312 (ns)  | 0.1551 (ns)    | 0.0815 (ns)    |
| 25                                     | 0.9353 (ns)    | 0.0943 (ns)  | 0.3101 (ns)    | <0.0001 (****) |
| 50                                     | 0.9763 (ns)    | 0.0068 (**)  | 0.0114 (*)     | <0.0001 (****) |
| 75                                     | 0.0038 (**)    | 0.0302 (*)   | <0.0001 (****) | <0.0001 (****) |
| 100                                    | <0.0001 (****) | 0.0077 (**)  | <0.0001 (****) | 0.0040 (**)    |
| 125                                    | <0.0001 (****) | 0.0004 (**)  | <0.0001 (****) | 0.5229 (ns)    |
| <b>Esterase activity change, 3 h</b>   |                |              |                |                |
| 1                                      | 0.9777 (ns)    | 0.8151 (ns)  | 0.9728 (ns)    | 0.9997 (ns)    |
| 10                                     | 0.2180 (ns)    | >0.9999 (ns) | 0.9946 (ns)    | 0.9867 (ns)    |
| 25                                     | 0.9667 (ns)    | 0.4053 (ns)  | 0.4241 (ns)    | 0.4888 (ns)    |
| 50                                     | 0.0002 (**)    | 0.0013 (**)  | 0.6939 (ns)    | <0.0001 (****) |
| <b>Esterase activity change, 24 h</b>  |                |              |                |                |
| 1                                      | 0.9792 (ns)    | 0.1263 (ns)  | 0.2951 (ns)    | 0.9999 (ns)    |
| 10                                     | 0.9557 (ns)    | 0.7828 (ns)  | 0.1628 (ns)    | 0.9851 (ns)    |
| 25                                     | 0.6532 (ns)    | 0.7801 (ns)  | 0.1140 (ns)    | 0.9999 (ns)    |
| 50                                     | 0.8160 (ns)    | 0.0005 (**)  | 0.1652 (ns)    | 0.5621 (ns)    |
| <b>Membrane potential change, 3 h</b>  |                |              |                |                |
| 1                                      | <0.0001 (****) | 0.6373 (ns)  | 0.1838 (ns)    | 0.1657 (ns)    |
| 10                                     | <0.0001 (****) | 0.6209 (ns)  | 0.0881 (ns)    | 0.1049 (ns)    |
| 25                                     | <0.0001 (****) | 0.3499 (ns)  | 0.0107 (*)     | 0.0074 (**)    |
| 50                                     | <0.0001 (****) | 0.3301 (ns)  | 0.1120 (ns)    | 0.0136 (*)     |
| <b>Membrane potential change, 24 h</b> |                |              |                |                |
| 1                                      | 0.0006 (**)    | 0.9835 (ns)  | 0.8623 (ns)    | 0.9569 (ns)    |
| 10                                     | <0.0001 (****) | 0.1924 (ns)  | 0.0860 (ns)    | 0.9993 (ns)    |
| 25                                     | <0.0001 (****) | 0.3057 (ns)  | 0.1285 (ns)    | 0.9327 (ns)    |
| 50                                     | <0.0001 (****) | 0.0581 (ns)  | 0.4097 (ns)    | <0.0001 (****) |
| <b>ROS generation change, 3 h</b>      |                |              |                |                |
| 1                                      | 0.6905 (ns)    | >0.9999 (ns) | 0.9549 (ns)    | 0.9419 (ns)    |
| 10                                     | 0.9960 (ns)    | 0.9922 (ns)  | 0.6762 (ns)    | 0.8420 (ns)    |
| 25                                     | >0.9999 (ns)   | 0.7576 (ns)  | 0.6435 (ns)    | 0.9999 (ns)    |
| 50                                     | 0.0009 (**)    | 0.0268 (*)   | 0.9989 (ns)    | 0.6460 (ns)    |
| <b>ROS generation change, 24 h</b>     |                |              |                |                |
| 1                                      | 0.2073 (ns)    | 0.1793 (ns)  | 0.5034 (ns)    | 0.1789 (ns)    |
| 10                                     | 0.3285 (ns)    | 0.2060 (ns)  | 0.2365 (ns)    | 0.1127 (ns)    |
| 25                                     | 0.9943 (ns)    | 0.0018 (**)  | 0.2885 (ns)    | 0.0014 (**)    |
| 50                                     | <0.0001 (****) | 0.0221 (*)   | 0.6827 (ns)    | <0.0001 (****) |

ROS, Reactive oxygen species; ns, nonsignificant ( $p > 0.05$ ); \*,  $p < 0.05$ ; \*\*,  $p < 0.005$ ; \*\*\*,  $p < 0.0005$ ; \*\*\*\*,  $p < 0.0001$ .
